# Supplementary material for: Influence of ionic strength on the interaction of THA and its Cu(ii) complex with DNA helps to explain studies on various breast cancer cells
Source: Royal Society of Chemistry journal article supplement (doi:10.1039/c5ra07805a), 2015-01-01
Supplement: c5ra07805a1.pdf [file c5ra07805a1.pdf]

## **Supplementary Information for the manuscript**

### **Influence of ionic strength on the interaction of purpurin with DNA that helps to explain studies of it and its Cu<sup>II</sup> complex on some breast cancer cells**

**<sup>1</sup>Piyal Das, <sup>2</sup>Debalina Bhattacharya, <sup>2</sup>Parimal Karmakar, <sup>1</sup>Saurabh Das\***

**<sup>1</sup>Department of Chemistry, Jadavpur University, Kolkata - 700 032, INDIA**

**<sup>2</sup>Department of Life Science and Biotechnology, Jadavpur University, Kolkata - 700 032,  
INDIA**

Fig. 1S

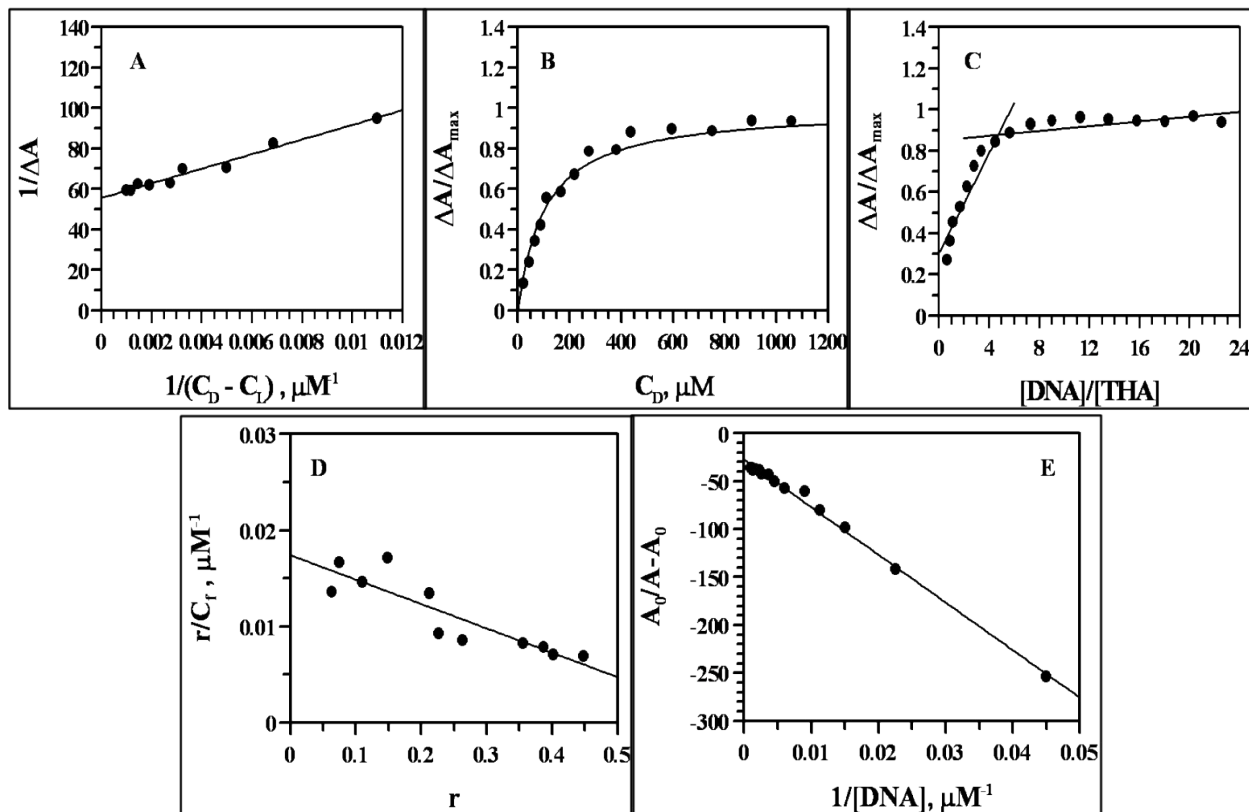

**Figure 1S:** A) Double reciprocal plot for the interaction of THA with c t DNA that was followed by UV-Vis spectroscopy; B) Non-linear fit analysis of the same; C) Plots of normalized increase of absorbance as a function of mole-ratio of c t DNA to THA; D) Scatchard plot of the above interaction; E) the corresponding Benesi-Hildebrand plot; [THA] = 75 $\mu$ M, [NaCl] = 80 mM; [TRIS] = 15 mM of pH = 7.42; T = 298 K.
